# Supplementary material
Source: publisher site journal article supplement (https://www.spandidos-publications.com/8125/downloadSupplementary)
Supplement: Supplementary file 1 [file downloadSupplementary]

## Sheet: KEGG
Table SIV. KEGG enrichment analysis. KEGG, Kyoto Encyclopedia of Genes and Genomes.
Category	Term	Count	%	PValue	Genes	List Total	Pop Hits	Pop Total	Fold Enrichment	Bonferroni	Benjamini	FDR
KEGG_PATHWAY	hsa05200:Pathways in cancer	23	39.6552	1.81514e-13	ALK, GSK3B, NOS2, DAPK1, FLT3, F2, PTGS2, ESR1, MMP9, EGFR, TGFBR1, PTK2, ESR2, IGF1R, CCNA2, IKBKB, AR, CDK6, TERT, KIT, CDK2, PIM1, MET	56	533	8865	6.83111	3.55782e-11	3.55768e-11	2.37783e-11
KEGG_PATHWAY	hsa04151:PI3K-Akt signaling pathway	15	25.8621	2.64531e-08	GSK3B, SYK, NOS3, FLT3, EGFR, PIK3CG, PTK2, IGF1R, IKBKB, CDK6, KIT, CDK2, KDR, MET, MCL1	56	362	8865	6.55954	5.18479e-06	2.5924e-06	1.73268e-06
KEGG_PATHWAY	hsa05215:Prostate cancer	8	13.7931	2.13791e-06	IKBKB, GSK3B, AR, CDK2, MMP3, MMP9, EGFR, IGF1R	56	98	8865	12.9227	0.000418944	0.000112193	7.49861e-05
KEGG_PATHWAY	hsa01522:Endocrine resistance	8	13.7931	2.28965e-06	SRC, MAPK14, ESR1, MMP9, PTK2, EGFR, ESR2, IGF1R	56	99	8865	12.7922	0.000448672	0.000112193	7.49861e-05
KEGG_PATHWAY	hsa04926:Relaxin signaling pathway	8	13.7931	1.4017e-05	MMP13, NOS2, SRC, NOS3, MAPK14, MMP9, EGFR, TGFBR1	56	130	8865	9.74176	0.00274359	0.000549467	0.000367246
KEGG_PATHWAY	hsa05206:MicroRNAs in cancer	11	18.9655	1.80629e-05	IKBKB, ABCC1, ABCB1, CDK6, PIM1, CYP1B1, PTGS2, MET, MMP9, EGFR, MCL1	56	312	8865	5.58122	0.00353409	0.000590053	0.000394372
KEGG_PATHWAY	hsa04657:IL-17 signaling pathway	7	12.069	2.4528e-05	IKBKB, GSK3B, MMP13, MMP3, MAPK14, PTGS2, MMP9	56	95	8865	11.6645	0.00479601	0.000686784	0.000459024
KEGG_PATHWAY	hsa04370:VEGF signaling pathway	6	10.3448	3.2177e-05	SRC, NOS3, KDR, MAPK14, PTGS2, PTK2	56	60	8865	15.8304	0.00628694	0.000718068	0.000479934
KEGG_PATHWAY	hsa05205:Proteoglycans in cancer	9	15.5172	3.29725e-05	SRC, KDR, MAPK14, ESR1, MET, MMP9, PTK2, EGFR, IGF1R	56	204	8865	6.98398	0.00644188	0.000718068	0.000479934
KEGG_PATHWAY	hsa05120:Epithelial cell signaling in Helicobacter pylori infection	6	10.3448	7.28417e-05	IKBKB, ADAM17, SRC, MAPK14, MET, EGFR	56	71	8865	13.3778	0.014176	0.0014277	0.000954226
KEGG_PATHWAY	hsa01521:EGFR tyrosine kinase inhibitor resistance	6	10.3448	0.000128926	GSK3B, SRC, KDR, MET, EGFR, IGF1R	56	80	8865	11.8728	0.0249544	0.00229722	0.00153539
KEGG_PATHWAY	hsa04068:FoxO signaling pathway	7	12.069	0.000161559	IKBKB, PLK1, CDK2, MAPK14, EGFR, TGFBR1, IGF1R	56	133	8865	8.33177	0.0311719	0.0026388	0.00176369
KEGG_PATHWAY	hsa05167:Kaposi sarcoma-associated herpesvirus infection	8	13.7931	0.000191664	IKBKB, GSK3B, CDK6, SYK, SRC, MAPK14, PTGS2, PIK3CG	56	196	8865	6.46137	0.0368727	0.00283267	0.00189326
KEGG_PATHWAY	hsa05418:Fluid shear stress and atherosclerosis	7	12.069	0.00022228	IKBKB, SRC, NOS3, KDR, MAPK14, MMP9, PTK2	56	141	8865	7.85904	0.0426361	0.00283267	0.00189326
KEGG_PATHWAY	hsa05235:PD-L1 expression and PD-1 checkpoint pathway in cancer	6	10.3448	0.000224884	ALK, IKBKB, CSNK2A1, LCK, MAPK14, EGFR	56	90	8865	10.5536	0.0431247	0.00283267	0.00189326
KEGG_PATHWAY	hsa00330:Arginine and proline metabolism	5	8.62069	0.000247129	MAOB, NOS2, NOS3, ARG1, ODC1	56	50	8865	15.8304	0.0472887	0.00283267	0.00189326
KEGG_PATHWAY	hsa04520:Adherens junction	6	10.3448	0.000262212	CSNK2A1, SRC, MET, EGFR, TGFBR1, IGF1R	56	93	8865	10.2131	0.0501017	0.00283267	0.00189326
KEGG_PATHWAY	hsa05222:Small cell lung cancer	6	10.3448	0.000262212	IKBKB, CDK6, NOS2, CDK2, PTGS2, PTK2	56	93	8865	10.2131	0.0501017	0.00283267	0.00189326
KEGG_PATHWAY	hsa04913:Ovarian steroidogenesis	5	8.62069	0.000287852	ALOX5, CYP1B1, PTGS2, CYP19A1, IGF1R	56	52	8865	15.2215	0.0548647	0.00283267	0.00189326
KEGG_PATHWAY	hsa05224:Breast cancer	7	12.069	0.000289048	GSK3B, CDK6, KIT, ESR1, EGFR, ESR2, IGF1R	56	148	8865	7.48733	0.0550862	0.00283267	0.00189326
TOP 20
KEGG_PATHWAY	hsa05226:Gastric cancer	7	12.069	0.000310761	GSK3B, ABCB1, TERT, CDK2, MET, EGFR, TGFBR1	56	150	8865	7.3875	0.0591002	0.00290044	0.00193856
KEGG_PATHWAY	hsa05417:Lipid and atherosclerosis	8	13.7931	0.000347468	IKBKB, GSK3B, SRC, NOS3, MMP3, MAPK14, MMP9, PTK2	56	216	8865	5.8631	0.0658475	0.00309562	0.00206901
KEGG_PATHWAY	hsa04148:Efferocytosis	7	12.069	0.000397041	ADAM17, ARG1, ALOX5, ODC1, MAPK14, PTGS2, PTK2	56	157	8865	7.05812	0.0748833	0.00327809	0.00219097
KEGG_PATHWAY	hsa04110:Cell cycle	7	12.069	0.00041076	CCNA2, GSK3B, CDK6, PLK1, CDK2, CDK1, AURKB	56	158	8865	7.01345	0.0773686	0.00327809	0.00219097
KEGG_PATHWAY	hsa05163:Human cytomegalovirus infection	8	13.7931	0.000456769	IKBKB, GSK3B, CDK6, SRC, MAPK14, PTGS2, PTK2, EGFR	56	226	8865	5.60367	0.0856549	0.00327809	0.00219097
KEGG_PATHWAY	hsa04064:NF-kappa B signaling pathway	6	10.3448	0.000460502	IKBKB, CSNK2A1, SYK, PARP1, LCK, PTGS2	56	105	8865	9.04592	0.0863239	0.00327809	0.00219097
KEGG_PATHWAY	hsa05208:Chemical carcinogenesis - reactive oxygen species	8	13.7931	0.000469061	IKBKB, SRC, CYP1B1, NOX4, MAPK14, MET, PTK2, EGFR	56	227	8865	5.57898	0.0878561	0.00327809	0.00219097
KEGG_PATHWAY	hsa04010:MAPK signaling pathway	9	15.5172	0.00047729	IKBKB, FLT3, KIT, KDR, MAPK14, MET, EGFR, TGFBR1, IGF1R	56	300	8865	4.74911	0.0893269	0.00327809	0.00219097
KEGG_PATHWAY	hsa05161:Hepatitis B	7	12.069	0.000485023	CCNA2, IKBKB, SRC, CDK2, MAPK14, MMP9, TGFBR1	56	163	8865	6.79831	0.0907067	0.00327809	0.00219097
KEGG_PATHWAY	hsa04914:Progesterone-mediated oocyte maturation	6	10.3448	0.00059426	CCNA2, PLK1, CDK2, CDK1, MAPK14, IGF1R	56	111	8865	8.55695	0.109978	0.00383253	0.00256154
KEGG_PATHWAY	hsa05225:Hepatocellular carcinoma	7	12.069	0.000606166	GSK3B, CDK6, TERT, MET, EGFR, TGFBR1, IGF1R	56	170	8865	6.51838	0.112054	0.00383253	0.00256154
KEGG_PATHWAY	hsa05221:Acute myeloid leukemia	5	8.62069	0.000804622	CCNA2, IKBKB, FLT3, KIT, PIM1	56	68	8865	11.64	0.145953	0.0048445	0.00323791
KEGG_PATHWAY	hsa04668:TNF signaling pathway	6	10.3448	0.000815656	IKBKB, ADAM17, MMP3, MAPK14, PTGS2, MMP9	56	119	8865	7.98169	0.1478	0.0048445	0.00323791
KEGG_PATHWAY	hsa04917:Prolactin signaling pathway	5	8.62069	0.000946879	GSK3B, SRC, MAPK14, ESR1, ESR2	56	71	8865	11.1481	0.169457	0.00531137	0.00354994
KEGG_PATHWAY	hsa05165:Human papillomavirus infection	9	15.5172	0.000948458	CCNA2, IKBKB, GSK3B, CDK6, TERT, CDK2, PTGS2, PTK2, EGFR	56	333	8865	4.27847	0.169715	0.00531137	0.00354994
KEGG_PATHWAY	hsa04611:Platelet activation	6	10.3448	0.00105549	SYK, SRC, NOS3, F2, MAPK14, PIK3CG	56	126	8865	7.53827	0.186969	0.00574658	0.00384082
KEGG_PATHWAY	hsa05202:Transcriptional misregulation in cancer	7	12.069	0.00134201	CCNA2, FLT3, MMP3, MET, MMP9, PTK2, IGF1R	56	198	8865	5.59659	0.23142	0.00710903	0.00475144
KEGG_PATHWAY	hsa04510:Focal adhesion	7	12.069	0.00152501	GSK3B, SRC, KDR, MET, PTK2, EGFR, IGF1R	56	203	8865	5.45874	0.258538	0.00781635	0.00522419
KEGG_PATHWAY	hsa05135:Yersinia infection	6	10.3448	0.00158364	IKBKB, GSK3B, SRC, LCK, MAPK14, PTK2	56	138	8865	6.88276	0.267021	0.00781635	0.00522419
KEGG_PATHWAY	hsa04114:Oocyte meiosis	6	10.3448	0.00163505	AR, PLK1, CDK2, CDK1, MAPK14, IGF1R	56	139	8865	6.83325	0.274383	0.00781635	0.00522419
KEGG_PATHWAY	hsa04915:Estrogen signaling pathway	6	10.3448	0.00163505	SRC, NOS3, ESR1, MMP9, EGFR, ESR2	56	139	8865	6.83325	0.274383	0.00781635	0.00522419
KEGG_PATHWAY	hsa04015:Rap1 signaling pathway	7	12.069	0.00190185	SRC, KIT, KDR, MAPK14, MET, EGFR, IGF1R	56	212	8865	5.227	0.311416	0.0088753	0.00593196
KEGG_PATHWAY	hsa05219:Bladder cancer	4	6.89655	0.0020389	SRC, DAPK1, MMP9, EGFR	56	41	8865	15.4443	0.329701	0.00929357	0.00621152
KEGG_PATHWAY	hsa04218:Cellular senescence	6	10.3448	0.00278635	CCNA2, CDK6, CDK2, CDK1, MAPK14, TGFBR1	56	157	8865	6.04982	0.421251	0.0124119	0.00829571
KEGG_PATHWAY	hsa05171:Coronavirus disease - COVID-19	7	12.069	0.00339276	IKBKB, ADAM17, SYK, MMP3, F2, MAPK14, EGFR	56	238	8865	4.65599	0.486298	0.0144561	0.00966199
KEGG_PATHWAY	hsa04014:Ras signaling pathway	7	12.069	0.00339276	IKBKB, FLT3, KIT, KDR, MET, EGFR, IGF1R	56	238	8865	4.65599	0.486298	0.0144561	0.00966199
KEGG_PATHWAY	hsa04933:AGE-RAGE signaling pathway in diabetic complications	5	8.62069	0.00346876	NOS3, PIM1, NOX4, MAPK14, TGFBR1	56	101	8865	7.83681	0.493919	0.0144654	0.00966823
KEGG_PATHWAY	hsa04625:C-type lectin receptor signaling pathway	5	8.62069	0.0039877	IKBKB, SYK, SRC, MAPK14, PTGS2	56	105	8865	7.53827	0.543037	0.0162831	0.0108831
KEGG_PATHWAY	hsa04066:HIF-1 signaling pathway	5	8.62069	0.00455699	PFKFB3, NOS2, NOS3, EGFR, IGF1R	56	109	8865	7.26163	0.591479	0.018228	0.012183
KEGG_PATHWAY	hsa05145:Toxoplasmosis	5	8.62069	0.00501832	IKBKB, NOS2, ALOX5, MAPK14, PIK3CG	56	112	8865	7.06712	0.626959	0.0196718	0.013148
KEGG_PATHWAY	hsa05169:Epstein-Barr virus infection	6	10.3448	0.00841167	CCNA2, IKBKB, CDK6, SYK, CDK2, MAPK14	56	204	8865	4.65599	0.809034	0.0317367	0.0212118
KEGG_PATHWAY	hsa05415:Diabetic cardiomyopathy	6	10.3448	0.00858187	GSK3B, PARP1, NOS3, MAPK14, MMP9, TGFBR1	56	205	8865	4.63328	0.815352	0.0317367	0.0212118
KEGG_PATHWAY	hsa05203:Viral carcinogenesis	6	10.3448	0.00858187	CCNA2, CDK6, SYK, SRC, CDK2, CDK1	56	205	8865	4.63328	0.815352	0.0317367	0.0212118
KEGG_PATHWAY	hsa00220:Arginine biosynthesis	3	5.17241	0.0087961	NOS2, NOS3, ARG1	56	23	8865	20.6483	0.82301	0.0319266	0.0213387
KEGG_PATHWAY	hsa05230:Central carbon metabolism in cancer	4	6.89655	0.00959134	FLT3, KIT, MET, EGFR	56	71	8865	8.91851	0.848774	0.0341801	0.0228448
KEGG_PATHWAY	hsa05218:Melanoma	4	6.89655	0.010347	CDK6, MET, EGFR, IGF1R	56	73	8865	8.67417	0.869786	0.035205	0.0235299
KEGG_PATHWAY	hsa05223:Non-small cell lung cancer	4	6.89655	0.010347	ALK, CDK6, MET, EGFR	56	73	8865	8.67417	0.869786	0.035205	0.0235299
KEGG_PATHWAY	hsa05207:Chemical carcinogenesis - receptor activation	6	10.3448	0.0104178	AR, SRC, CYP1B1, ESR1, EGFR, ESR2	56	215	8865	4.41777	0.8716	0.035205	0.0235299
KEGG_PATHWAY	hsa05162:Measles	5	8.62069	0.0106413	IKBKB, GSK3B, CDK6, CSNK2A1, CDK2	56	139	8865	5.69437	0.877159	0.0353507	0.0236272
KEGG_PATHWAY	hsa04380:Osteoclast differentiation	5	8.62069	0.0117199	IKBKB, SYK, LCK, MAPK14, TGFBR1	56	143	8865	5.53509	0.900805	0.038285	0.0255884
KEGG_PATHWAY	hsa05212:Pancreatic cancer	4	6.89655	0.0119598	IKBKB, CDK6, EGFR, TGFBR1	56	77	8865	8.22356	0.905415	0.0384283	0.0256842
KEGG_PATHWAY	hsa05166:Human T-cell leukemia virus 1 infection	6	10.3448	0.0122873	CCNA2, IKBKB, TERT, LCK, CDK2, TGFBR1	56	224	8865	4.24027	0.911365	0.0388437	0.0259618
KEGG_PATHWAY	hsa04072:Phospholipase D signaling pathway	5	8.62069	0.0134662	SYK, KIT, F2, EGFR, PIK3CG	56	149	8865	5.3122	0.929864	0.041895	0.0280012
KEGG_PATHWAY	hsa04921:Oxytocin signaling pathway	5	8.62069	0.015371	SRC, NOS3, PTGS2, EGFR, PIK3CG	56	155	8865	5.10657	0.951979	0.0470737	0.0314625
KEGG_PATHWAY	hsa04012:ErbB signaling pathway	4	6.89655	0.0160921	GSK3B, SRC, PTK2, EGFR	56	86	8865	7.36296	0.958402	0.0485239	0.0324318
KEGG_PATHWAY	hsa05160:Hepatitis C	5	8.62069	0.016731	IKBKB, GSK3B, CDK6, CDK2, EGFR	56	159	8865	4.9781	0.963375	0.0496861	0.0332086
KEGG_PATHWAY	hsa05131:Shigellosis	6	10.3448	0.0189445	IKBKB, GSK3B, SRC, MAPK14, PTK2, EGFR	56	250	8865	3.79929	0.976453	0.0554198	0.0370408
KEGG_PATHWAY	hsa00350:Tyrosine metabolism	3	5.17241	0.0208073	MAOB, MIF, TYR	56	36	8865	13.192	0.983776	0.059974	0.0400847
KEGG_PATHWAY	hsa05142:Chagas disease	4	6.89655	0.025839	IKBKB, NOS2, MAPK14, TGFBR1	56	103	8865	6.14771	0.994089	0.0733977	0.0490566
KEGG_PATHWAY	hsa04659:Th17 cell differentiation	4	6.89655	0.0298899	IKBKB, LCK, MAPK14, TGFBR1	56	109	8865	5.80931	0.997388	0.0836916	0.0559368
KEGG_PATHWAY	hsa04062:Chemokine signaling pathway	5	8.62069	0.0313606	IKBKB, GSK3B, SRC, PTK2, PIK3CG	56	193	8865	4.10113	0.99806	0.086573	0.0578626
KEGG_PATHWAY	hsa05010:Alzheimer disease	7	12.069	0.0332221	IKBKB, GSK3B, ADAM17, CSNK2A1, NOS2, NOX4, PTGS2	56	391	8865	2.83408	0.998669	0.0904378	0.0604457
KEGG_PATHWAY	hsa04660:T cell receptor signaling pathway	4	6.89655	0.0397513	IKBKB, GSK3B, LCK, MAPK14	56	122	8865	5.19028	0.999647	0.10673	0.0713345
KEGG_PATHWAY	hsa04371:Apelin signaling pathway	4	6.89655	0.0557937	NOS2, NOS3, TGFBR1, PIK3CG	56	140	8865	4.52296	0.999987	0.147778	0.09877
KEGG_PATHWAY	hsa04936:Alcoholic liver disease	4	6.89655	0.0597223	IKBKB, GSK3B, NOX4, MAPK14	56	144	8865	4.39732	0.999994	0.156074	0.104315
KEGG_PATHWAY	hsa04664:Fc epsilon RI signaling pathway	3	5.17241	0.0681066	SYK, ALOX5, MAPK14	56	69	8865	6.88276	0.999999	0.175643	0.117394
KEGG_PATHWAY	hsa04934:Cushing syndrome	4	6.89655	0.0711782	GSK3B, CDK6, CDK2, EGFR	56	155	8865	4.08525	0.999999	0.181181	0.121095
KEGG_PATHWAY	hsa04020:Calcium signaling pathway	5	8.62069	0.0721116	NOS2, NOS3, KDR, MET, EGFR	56	254	8865	3.11621	1	0.181203	0.12111
KEGG_PATHWAY	hsa04115:p53 signaling pathway	3	5.17241	0.0787102	CDK6, CDK2, CDK1	56	75	8865	6.33214	1	0.195281	0.13052
KEGG_PATHWAY	hsa05214:Glioma	3	5.17241	0.0805255	CDK6, EGFR, IGF1R	56	76	8865	6.24883	1	0.197288	0.131861
KEGG_PATHWAY	hsa05220:Chronic myeloid leukemia	3	5.17241	0.082354	IKBKB, CDK6, TGFBR1	56	77	8865	6.16767	1	0.199276	0.13319
KEGG_PATHWAY	hsa05100:Bacterial invasion of epithelial cells	3	5.17241	0.0841953	SRC, MET, PTK2	56	78	8865	6.0886	1	0.201247	0.134507
KEGG_PATHWAY	hsa05140:Leishmaniasis	3	5.17241	0.0860492	NOS2, MAPK14, PTGS2	56	79	8865	6.01153	1	0.203201	0.135813
KEGG_PATHWAY	hsa00360:Phenylalanine metabolism	2	3.44828	0.0948554	MAOB, MIF	56	16	8865	19.7879	1	0.221329	0.147929
